# Supplementary material for: Distribution and Long-Term Trends of Tropospheric Ozone Concentrations in Ireland
Source: MDPI journal article supplement (doi:10.3390/atmos14030569), 2023-03-16
Supplement: s1 [file s1]

## Supplementary Materials:

Keelan McHugh<sup>1\*</sup>, Thomas Cummins<sup>1</sup> and Julian Aherne<sup>2</sup>

**Table S1.** Annual mean O<sub>3</sub> concentrations (µg/m<sup>3</sup>) at ambient air quality monitoring stations in Ireland for the period 2015–2019.

| Station | 2015 | 2016 | 2017 | 2018 | 2019 | Average |
|---------|------|------|------|------|------|---------|
| BFT     | 43.2 | 41.3 | 45.0 | 41.3 | 40.8 | 42.3    |
| CBR     | 57.7 | 50.9 | 55.7 | 57.7 | 56.3 | 55.7    |
| CSK     | 53.7 | 47.1 | 52.7 | 53.8 | 49.0 | 51.3    |
| CSL     | 42.9 | 31.7 | 34.7 | 40.4 | 46.8 | 39.3    |
| EMO     | 54.2 | 49.8 | 57.0 | 56.7 | 51.3 | 53.8    |
| KKT     | 59.6 | 57.1 | 57.7 | 58.8 | 58.0 | 58.2    |
| LNV     | 54.4 | 46.9 | 48.5 | 50.3 | 53.5 | 50.7    |
| MHD     | 76.0 | 71.8 | 75.8 | 74.8 | 73.9 | 74.5    |
| RTM     | 42.6 | 36.3 | 44.2 | 47.1 | 46.7 | 43.3    |
| SVL     | 54.8 | 43.5 | 52.4 | 55.5 | 54.4 | 52.1    |
| VAL     | 71.3 | 69.1 | 65.7 | 67.5 | 72.4 | 69.2    |
| Ireland | 55.5 | 49.6 | 53.6 | 54.9 | 54.8 | 53.7    |

**Table S2.** Seasonal mean O<sub>3</sub> concentrations 2015–2019.

| Station | Winter DJF | Spring MAM | Summer JJA | Autumn SON |
|---------|------------|------------|------------|------------|
| BFT     | 37.8       | 54.6       | 41.9       | 35.3       |
| CBR     | 56.4       | 68.4       | 51.0       | 47.1       |
| CSK     | 51.8       | 61.2       | 48.2       | 43.8       |
| CSL     | 36.2       | 51.6       | 34.6       | 34.3       |
| EMO     | 57.1       | 65.4       | 48.3       | 45.2       |
| KKT     | 58.3       | 71.8       | 51.0       | 51.8       |
| LNV     | 53.6       | 59.7       | 46.6       | 43.0       |
| MHD     | 78.4       | 84.9       | 64.7       | 69.9       |
| RTM     | 43.7       | 52.6       | 39.1       | 36.9       |
| SVL     | 54.4       | 62.7       | 46.7       | 44.4       |
| VAL     | 74.4       | 79.6       | 57.7       | 65.6       |
| Average | 54.7       | 64.8       | 48.2       | 47.0       |
| Median  | 54.4       | 62.7       | 48.2       | 44.4       |

**Table S3.** Monthly mean values for the period 2015–2019.

|     | BFT  | CBR  | CSK  | CSL  | EMO  | KKT  | LNV  | MHD  | RTM  | SVL  | VAL  |
|-----|------|------|------|------|------|------|------|------|------|------|------|
| Jan | 35.9 | 55.8 | 50.9 | 32.5 | 56.8 | 52.9 | 55.2 | 78.4 | 41.3 | 54.7 | 74.8 |
| Feb | 44.5 | 60.3 | 54.4 | 39.3 | 61.3 | 64.5 | 56.3 | 80.5 | 46.8 | 57.2 | 76.5 |
| Mar | 48.6 | 67.0 | 60.5 | 48.1 | 67.3 | 70.4 | 58.4 | 85.1 | 52.1 | 61.9 | 78.9 |
| Apr | 58.1 | 69.2 | 61.7 | 55.6 | 66.6 | 74.8 | 60.1 | 86.3 | 52.9 | 65.0 | 81.2 |
| May | 57.4 | 69.1 | 61.4 | 51.2 | 62.2 | 70.1 | 60.6 | 83.3 | 53.0 | 61.1 | 78.6 |
| Jun | 47.0 | 59.6 | 54.2 | 45.2 | 52.2 | 59.5 | 52.0 | 71.5 | 45.2 | 54.4 | 66.6 |
| Jul | 41.1 | 46.8 | 45.3 | 32.2 | 46.1 | 46.9 | 44.6 | 59.4 | 34.6 | 43.3 | 51.1 |
| Aug | 38.0 | 46.7 | 45.1 | 26.3 | 46.5 | 46.6 | 43.2 | 63.3 | 37.5 | 42.4 | 55.3 |
| Sep | 38.8 | 47.4 | 43.9 | 32.8 | 43.7 | 49.9 | 41.6 | 67.5 | 37.4 | 42.8 | 60.8 |
| Oct | 35.2 | 47.1 | 43.5 | 33.7 | 45.6 | 53.3 | 43.8 | 70.0 | 36.6 | 43.7 | 69.1 |
| Nov | 32.2 | 46.8 | 44.0 | 36.4 | 46.2 | 52.0 | 43.7 | 72.3 | 36.7 | 46.6 | 66.9 |

|     |      |      |      |      |      |      |      |      |      |      |      |
|-----|------|------|------|------|------|------|------|------|------|------|------|
| Dec | 32.8 | 53.2 | 50.2 | 36.8 | 53.1 | 57.5 | 49.4 | 76.3 | 42.9 | 51.3 | 71.9 |
|-----|------|------|------|------|------|------|------|------|------|------|------|

**Table S4.** Long-term trends using Mann-Kendall test during 10-year period (2005–2019), for chosen percentiles of data for each station, the p-value with significance is shown.

| Percentile | 2     | 5     | 10    | 25      | 50     | 75     | 90     | 95   | 98   |
|------------|-------|-------|-------|---------|--------|--------|--------|------|------|
| <b>BFT</b> | 0.30  | 0.19  | 0.15  | 0.15    | 0.24   | 0.19   | 0.08   | 0.19 | 0.19 |
| <b>CBR</b> | 0.24  | 0.43  | 0.24  | *0.04   | 0.07   | **0.01 | **0.01 | 0.08 | 0.08 |
| <b>CSK</b> | 0.15  | 0.15  | 0.24  | 0.30    | 0.24   | 0.19   | 0.36   | 0.43 | 0.30 |
| <b>EMO</b> | *0.04 | *0.02 | *0.02 | 0.08    | *0.02  | *0.02  | 0.15   | 0.30 | 0.36 |
| <b>KKT</b> | 0.24  | 0.36  | 0.36  | 0.36    | 0.24   | 0.30   | 0.24   | 0.36 | 0.50 |
| <b>LNV</b> | 0.11  | 0.15  | 0.19  | 0.36    | 0.24   | 0.30   | 0.50   | 0.43 | 0.15 |
| <b>MHD</b> | 0.19  | 0.03  | 0.36  | 0.43    | 0.15   | *0.04  | 0.08   | 0.15 | 0.19 |
| <b>RTM</b> | 0.24  | 0.03  | 0.08  | ***0.00 | **0.01 | *0.04  | 0.05   | 0.08 | 0.19 |
| <b>VAL</b> | 0.43  | 0.36  | 0.30  | 0.50    | 0.19   | 0.15   | 0.19   | 0.24 | 0.24 |

**Table S5.** Long-term trends using Mann-Kendall test during 15-year period (2005–2019), for chosen percentiles of data for each station, the p-value with significance is shown.

| Percentile | 2       | 5     | 10     | 25    | 50   | 75   | 90   | 95   | 98   |
|------------|---------|-------|--------|-------|------|------|------|------|------|
| <b>BFT</b> | *0.05   | 0.19  | **0.01 | *0.03 | 0.30 | 0.46 | 0.77 | 0.32 | 0.59 |
| <b>EMO</b> | **0.01  | *0.02 | *0.05  | 0.12  | 0.06 | 0.11 | 0.66 | 0.84 | 1.00 |
| <b>KKT</b> | 0.73    | 0.84  | 0.62   | 0.65  | 1.00 | 0.77 | 1.00 | 1.00 | 0.84 |
| <b>LNV</b> | 0.11    | 0.07  | *0.02  | 0.84  | 0.09 | 0.32 | 0.23 | 0.14 | 0.37 |
| <b>MHD</b> | ***0.00 | *0.04 | 0.32   | 0.62  | 0.88 | 1.00 | 0.69 | 0.55 | 0.46 |
| <b>RTM</b> | 0.23    | 0.16  | 0.18   | 0.06  | 0.46 | 0.80 | 0.84 | 0.92 | 1.00 |
| <b>VAL</b> | 0.43    | 0.52  | 1.00   | 0.92  | 0.84 | 1.00 | 0.43 | 0.32 | 0.37 |

**Table S6.** Monthly long-term trend slope with significance for 10-years (2010–2019).

|            | <b>BFT</b> | <b>CBR</b> | <b>CSK</b> | <b>EMO</b> | <b>KKT</b> | <b>LNV</b> | <b>MHD</b> | <b>RTM</b> | <b>VAL</b> |
|------------|------------|------------|------------|------------|------------|------------|------------|------------|------------|
| <b>Jan</b> | 0.88       | 1.95       | 1.07       | 1.70+      | 0.00       | 0.43       | 0.99*      | 0.80       | 2.22       |
| <b>Feb</b> | 1.36*      | 1.21+      | 1.60       | 1.36*      | 1.01+      | 0.51+      | 0.63       | 1.74*      | 1.80*      |
| <b>Mar</b> | 0.50       | 1.66*      | 1.56*      | 2.00       | -0.05      | 0.69+      | 0.95+      | 1.40+      | 1.21       |
| <b>Apr</b> | 0.45       | -0.59      | -0.14      | 0.07       | -0.53      | -0.20      | -0.28      | 0.69       | 0.87       |
| <b>May</b> | -0.26      | 0.36       | -0.69      | 0.64       | 0.10       | -0.77      | 0.06       | 0.64       | 1.35       |
| <b>Jun</b> | 0.25       | 1.21***    | 0.68       | 0.97       | 0.55       | -0.16      | 0.71       | 0.50       | 0.82       |
| <b>Jul</b> | 0.31       | 0.37       | -0.08      | 1.20       | 0.03       | -0.52      | -0.06      | -0.42      | -0.40      |
| <b>Aug</b> | 0.58       | -0.12      | -0.10      | 0.68       | -0.14      | -0.41      | 0.10       | -0.23      | -0.39      |
| <b>Sep</b> | -0.21      | -0.42      | -0.67      | 0.03       | -0.55      | -1.25      | -0.39      | -0.22      | -1.25+     |
| <b>Oct</b> | 0.31       | 0.38       | -0.51      | 0.81       | 0.45       | 0.01       | 0.42       | 0.28       | -0.48      |
| <b>Nov</b> | -0.61      | 0.02       | -0.34      | 0.36       | 0.02       | -0.48      | -0.63      | -0.10      | -0.81*     |
| <b>Dec</b> | 0.06       | 0.99       | 1.13       | 0.94       | -0.05      | 0.15       | 0.34       | 0.68       | 0.35       |

**Table S7.** Monthly long-term trend slope with significance for 15-years (2005–2019).

|            | <b>BFT</b> | <b>EMO</b> | <b>KKT</b> | <b>LNV</b> | <b>MHD</b> | <b>RTM</b> | <b>VAL</b> |
|------------|------------|------------|------------|------------|------------|------------|------------|
| <b>Jan</b> | 0.82       | 0.77       | -0.12      | 0.64       | 0.60       | 0.21       | 0.68       |
| <b>Feb</b> | 1.03***    | 1.20*      | 0.83***    | 0.96***    | 0.52*      | 0.84       | 0.71       |
| <b>Mar</b> | 0.06       | 0.30       | -0.03      | 0.22       | 0.06       | 0.17       | -0.30      |
| <b>Apr</b> | -0.12      | -0.25      | -0.31      | 0.00       | -0.41      | -0.12      | -0.33      |
| <b>May</b> | -0.08      | 0.22       | -0.12      | -0.16      | -0.23      | -0.13      | -0.42      |
| <b>Jun</b> | -0.01      | 0.27       | -0.14      | -0.05      | -0.16      | -0.22      | -0.13      |
| <b>Jul</b> | 0.09       | 0.38       | -0.30      | -0.27      | -0.32      | -0.44      | -0.67      |
| <b>Aug</b> | 0.58+      | 0.75***    | 0.40       | 0.26       | 0.41       | 0.43       | 0.34       |
| <b>Sep</b> | 0.06       | 0.05       | -0.19      | -0.03      | -0.09      | -0.09      | -0.05      |
| <b>Oct</b> | 0.25       | 0.48       | 0.14       | 0.43+      | 0.12       | 0.30       | -0.10      |

|     |       |       |       |       |       |       |       |
|-----|-------|-------|-------|-------|-------|-------|-------|
| Nov | -0.31 | 0.07  | -0.46 | -0.42 | -0.29 | -0.13 | -0.35 |
| Dec | 0.50  | 0.98* | 0.26  | 0.77  | 0.62* | 0.89  | 0.39  |

Table S8. Significance values for 10-year long-term trends.

|           | BFT   | CBR     | CSK   | EMO   | KKT   | LNV   | MHD   | RTM   | VAL   |
|-----------|-------|---------|-------|-------|-------|-------|-------|-------|-------|
| January   | 0.35  | 0.13    | 0.17  | 0.07+ | 0.93  | 0.38  | 0.05* | 0.22  | 0.14  |
| February  | 0.03* | 0.08 +  | 0.17  | 0.01* | 0.01+ | 0.07+ | 0.48  | 0.02* | 0.03* |
| March     | 0.41  | 0.04*   | 0.02* | 0.11  | 0.96  | 0.06+ | 0.05+ | 0.05+ | 0.36  |
| April     | 0.73  | 0.34    | 0.78  | 0.90  | 0.15  | 0.20  | 0.26  | 0.40  | 0.60  |
| May       | 0.64  | 0.64    | 0.79  | 0.22  | 0.78  | 0.26  | 0.84  | 0.34  | 0.49  |
| June      | 0.17  | 0.00*** | 0.47  | 0.11  | 0.17  | 0.89  | 0.22  | 0.70  | 0.25  |
| July      | 0.45  | 0.19    | 0.90  | 0.10  | 0.97  | 0.22  | 0.77  | 0.77  | 0.35  |
| August    | 0.41  | 0.97    | 0.97  | 0.14  | 0.90  | 0.47  | 0.91  | 0.73  | 0.48  |
| September | 0.75  | 0.24    | 0.30  | 0.95  | 0.33  | 0.10  | 0.70  | 0.71  | 0.07+ |
| October   | 0.62  | 0.71    | 0.43  | 0.21  | 0.14  | 0.92  | 0.60  | 0.41  | 0.54  |
| November  | 0.59  | 0.84    | 0.83  | 0.40  | 0.99  | 0.20  | 0.66  | 0.99  | 0.01* |
| December  | 0.73  | 0.55    | 0.42  | 0.39  | 0.91  | 0.82  | 0.58  | 0.64  | 0.55  |

Table S9. Significance values for 15-year long-term trends.

|           | BFT   | CBR     | CSK   | EMO   | KKT   | LNV   | MHD   | RTM   | VAL   |
|-----------|-------|---------|-------|-------|-------|-------|-------|-------|-------|
| January   | 0.35  | 0.13    | 0.17  | 0.07+ | 0.93  | 0.38  | 0.05* | 0.22  | 0.14  |
| February  | 0.03* | 0.08 +  | 0.17  | 0.01* | 0.01+ | 0.07+ | 0.48  | 0.02* | 0.03* |
| March     | 0.41  | 0.04*   | 0.02* | 0.11  | 0.96  | 0.06+ | 0.05+ | 0.05+ | 0.36  |
| April     | 0.73  | 0.34    | 0.78  | 0.90  | 0.15  | 0.20  | 0.26  | 0.40  | 0.60  |
| May       | 0.64  | 0.64    | 0.79  | 0.22  | 0.78  | 0.26  | 0.84  | 0.34  | 0.49  |
| June      | 0.17  | 0.00*** | 0.47  | 0.11  | 0.17  | 0.89  | 0.22  | 0.70  | 0.25  |
| July      | 0.45  | 0.19    | 0.90  | 0.10  | 0.97  | 0.22  | 0.77  | 0.77  | 0.35  |
| August    | 0.41  | 0.97    | 0.97  | 0.14  | 0.90  | 0.47  | 0.91  | 0.73  | 0.48  |
| September | 0.75  | 0.24    | 0.30  | 0.95  | 0.33  | 0.10  | 0.70  | 0.71  | 0.07+ |
| October   | 0.62  | 0.71    | 0.43  | 0.21  | 0.14  | 0.92  | 0.60  | 0.41  | 0.54  |
| November  | 0.59  | 0.84    | 0.83  | 0.40  | 0.99  | 0.20  | 0.66  | 0.99  | 0.01* |
| December  | 0.73  | 0.55    | 0.42  | 0.39  | 0.91  | 0.82  | 0.58  | 0.64  | 0.55  |

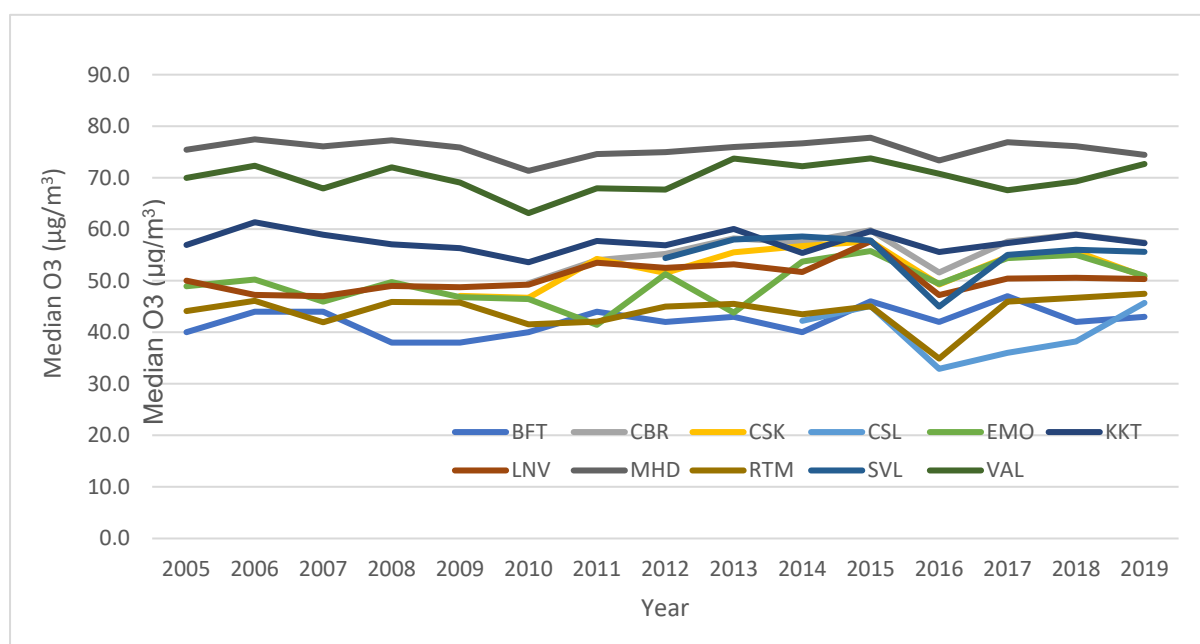

Figure S1. Annual median O3 concentrations for all stations over 2005–2019.51.

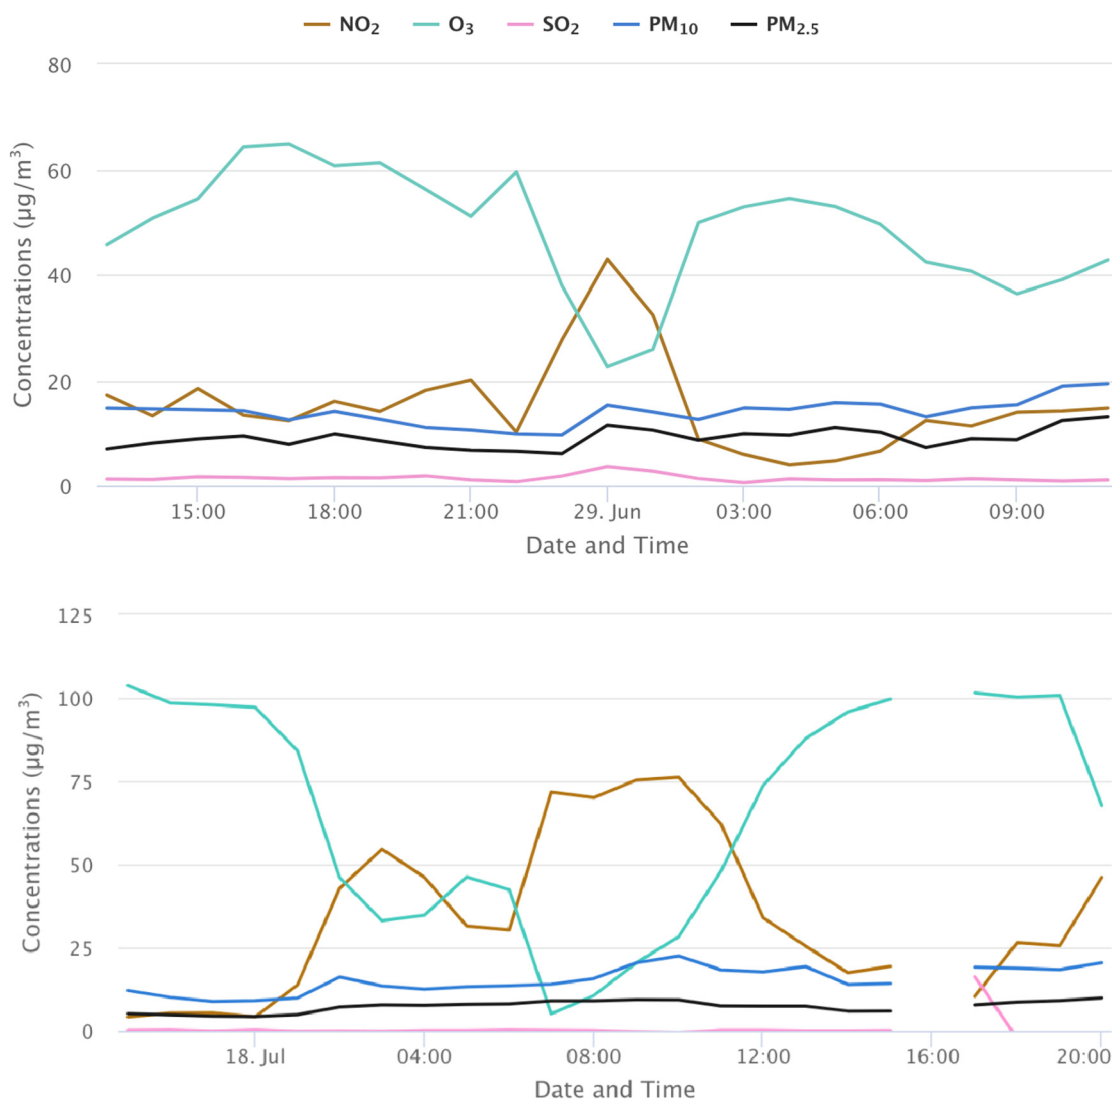

**Figure S2.** Gaseous and particulate concentrations for the urban station RTM, during summer 2021 (top graph 28–29 of June; bottom graph 17–18 July). Negative relationship between NO<sub>2</sub> and O<sub>3</sub> visible (screenshot source: <https://airquality.ie/station/EPA-22>).
